# Supplementary material
Source: PubMed Central journal article supplement (PMC7031334)

**A**

Mean symbiotic organ expression in TPM

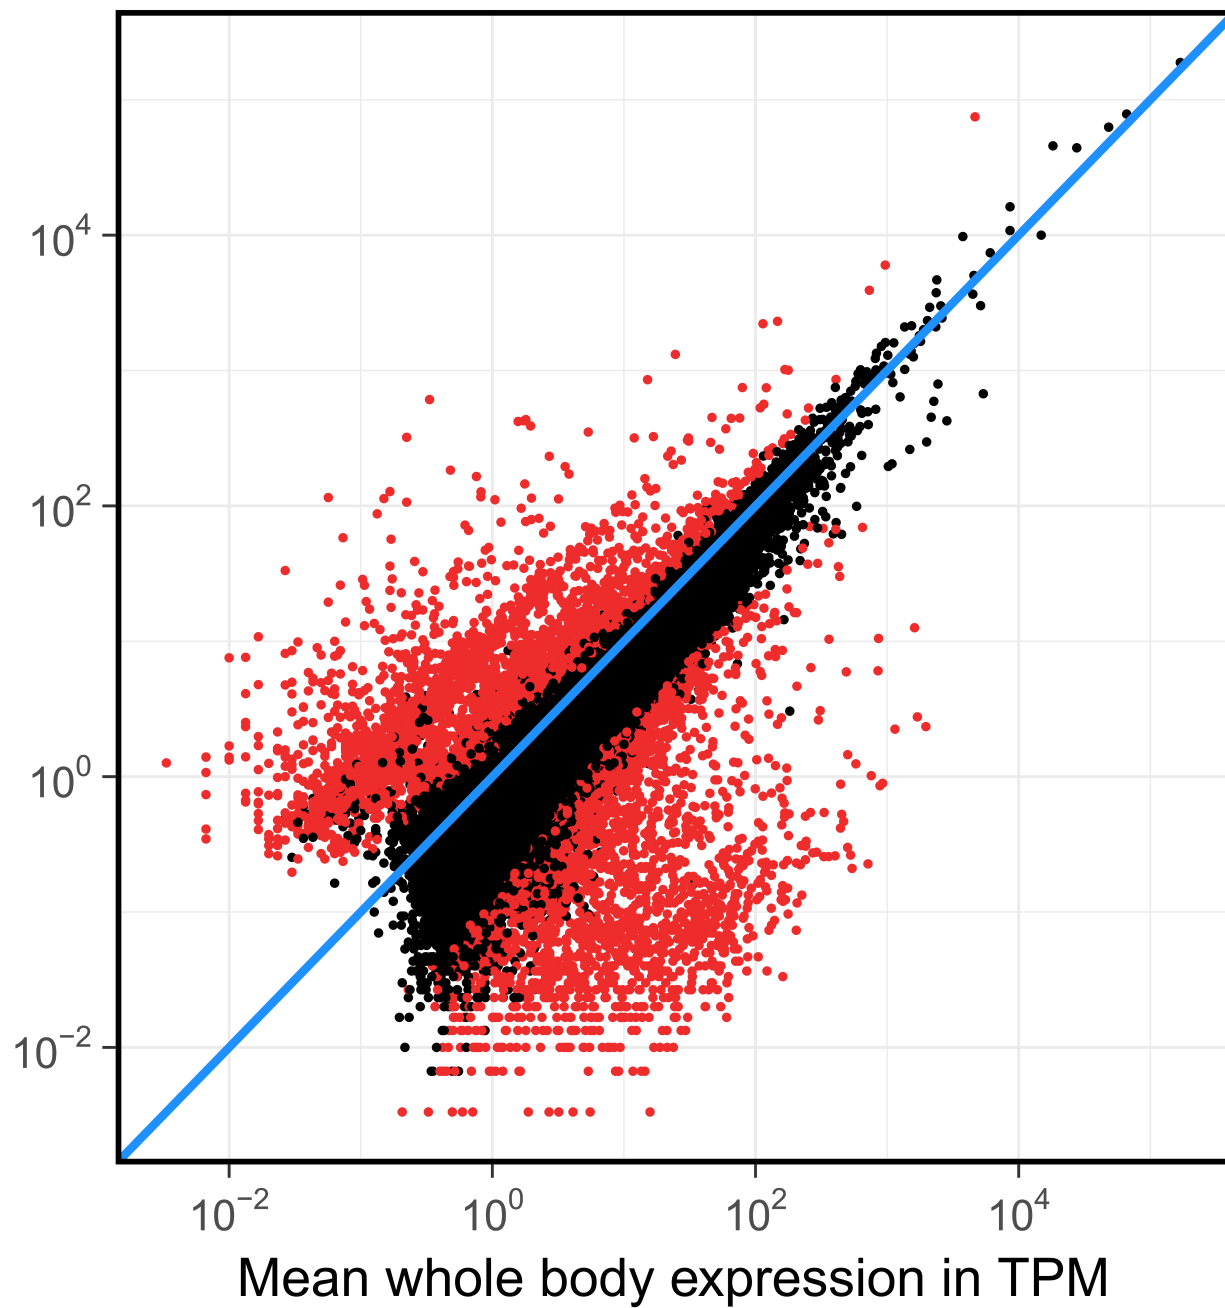**B**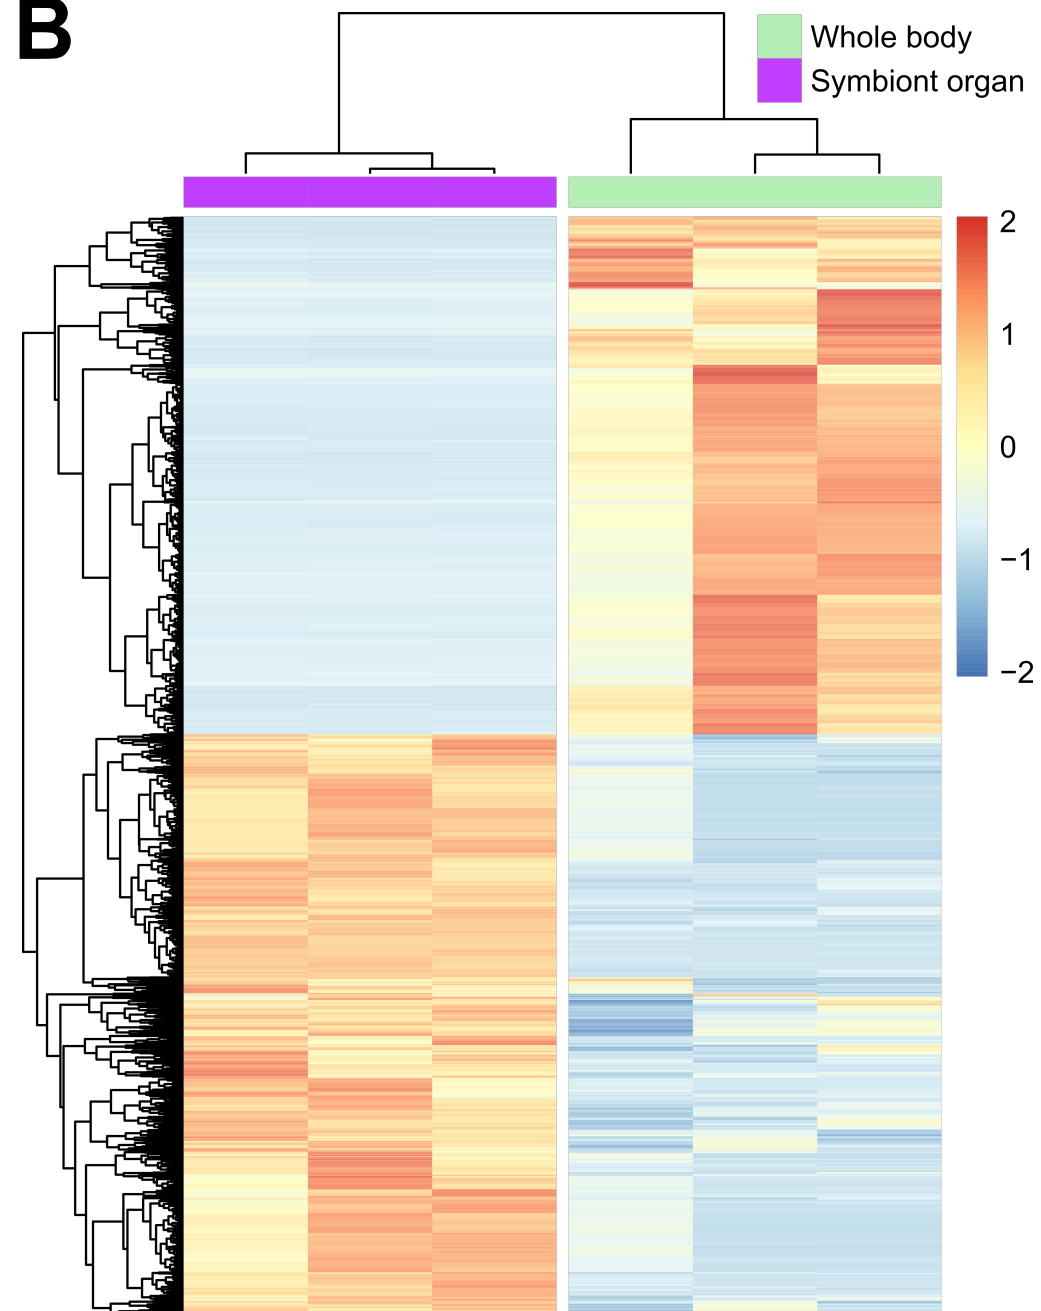

Supplement: 41396_2019_562_MOESM2_ESM.pdf [file 41396_2019_562_MOESM2_ESM.pdf]
